# Supplementary material
Source: JCI journal article supplement (doi:10.1172/jci197261)

# Full unedited gels for Figure 1: Sensitive AML

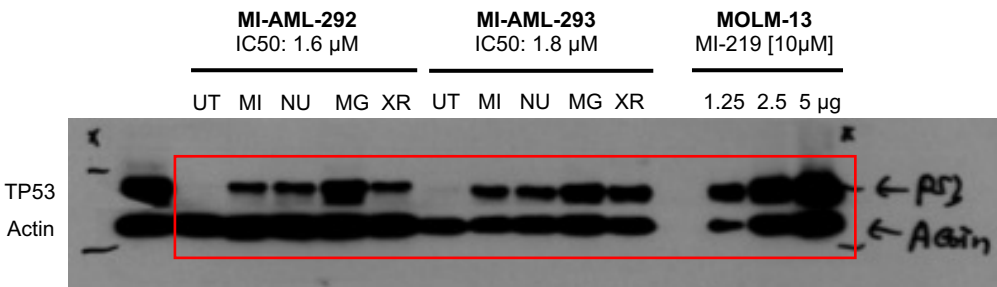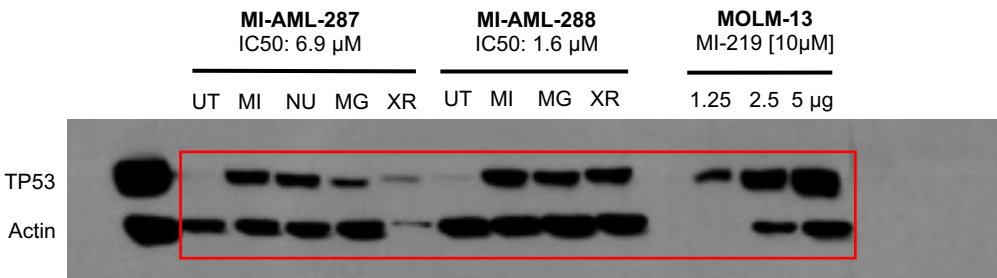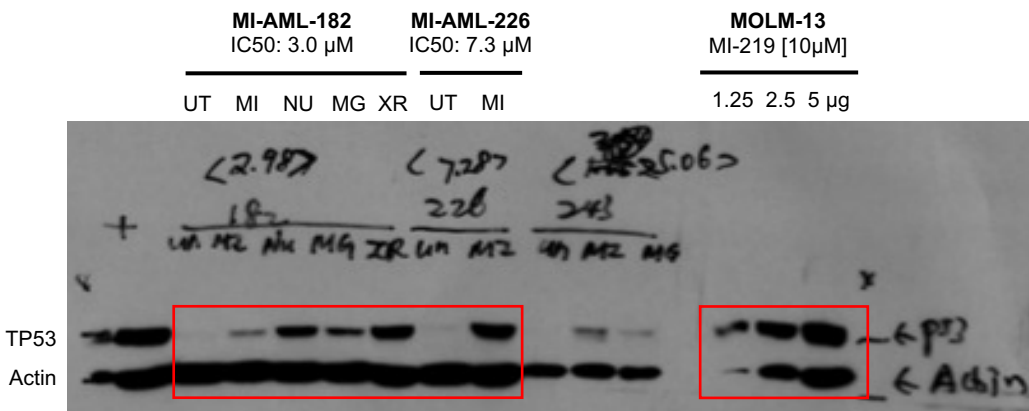

# Full unedited gels for Figure 1: Sensitive AML (continued)

**MI-AML-254**  
IC50: 4.8  $\mu$ M

**MI-AML-257**  
IC50: 6.9  $\mu$ M

**MOLM-13**  
MI-219 [10 $\mu$ M]

UT MI NU MG XR

UT MI NU MG XR

1.25 2.5 5  $\mu$ g

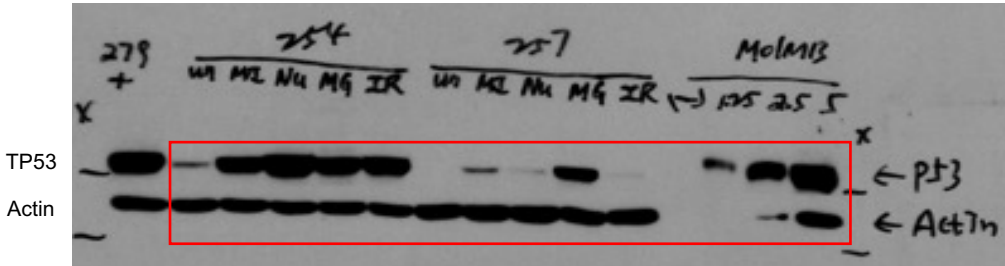

# Full unedited gels for Figure 1: Resistant AML

|                                         |    |    |    |    |                                         |    |    |    |    |                                       |     |           |
|-----------------------------------------|----|----|----|----|-----------------------------------------|----|----|----|----|---------------------------------------|-----|-----------|
| <b>MI-AML-263</b><br>IC50: > 20 $\mu$ M |    |    |    |    | <b>MI-AML-267</b><br>IC50: 15.7 $\mu$ M |    |    |    |    | <b>MOLM-13</b><br>MI-219 [10 $\mu$ M] |     |           |
| UT                                      | MI | NU | MG | XR | UT                                      | MI | NU | MG | XR | 1.25                                  | 2.5 | 5 $\mu$ g |

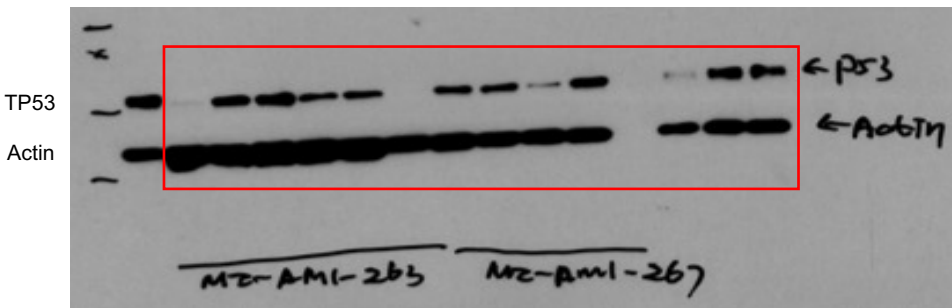

|                                         |    |    |    |    |                                         |    |    |    |    |                                       |     |           |
|-----------------------------------------|----|----|----|----|-----------------------------------------|----|----|----|----|---------------------------------------|-----|-----------|
| <b>MI-AML-253</b><br>IC50: 11.1 $\mu$ M |    |    |    |    | <b>MI-AML-255</b><br>IC50: > 20 $\mu$ M |    |    |    |    | <b>MOLM-13</b><br>MI-219 [10 $\mu$ M] |     |           |
| UT                                      | MI | NU | MG | XR | UT                                      | MI | NU | MG | XR | 1.25                                  | 2.5 | 5 $\mu$ g |

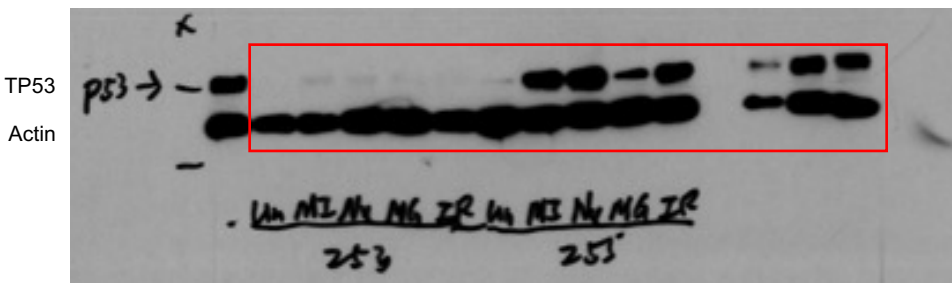

|                            |    |                          |    |                          |    |                           |    |                           |    |                                       |     |           |
|----------------------------|----|--------------------------|----|--------------------------|----|---------------------------|----|---------------------------|----|---------------------------------------|-----|-----------|
| <b>#68</b><br>10.9 $\mu$ M |    | <b>#63</b><br>20 $\mu$ M |    | <b>#98</b><br>20 $\mu$ M |    | <b>#101</b><br>20 $\mu$ M |    | <b>#138</b><br>20 $\mu$ M |    | <b>MOLM-13</b><br>MI-219 [10 $\mu$ M] |     |           |
| UT                         | MI | UT                       | MI | UT                       | MI | UT                        | MI | UT                        | MI | 1.25                                  | 2.5 | 5 $\mu$ g |

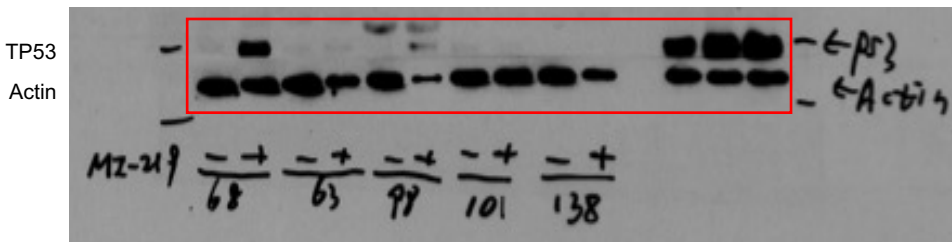

# Full unedited gels for Figure 1: Resistant AML (continued)

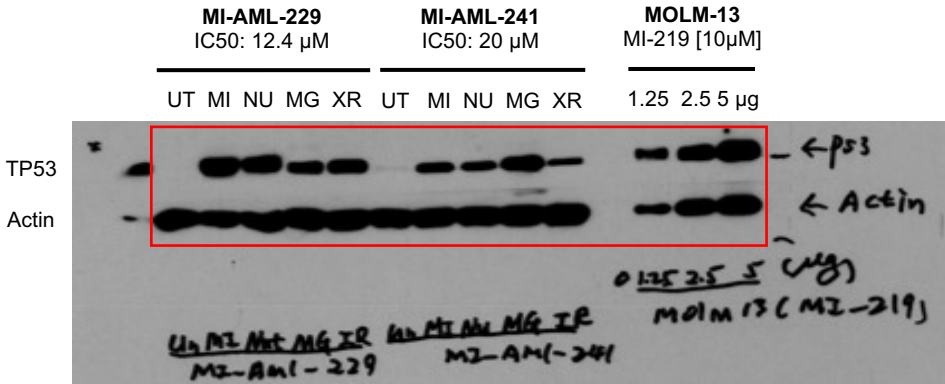

# Full unedited gels for Supplementary Figure 1: Sensitive AML

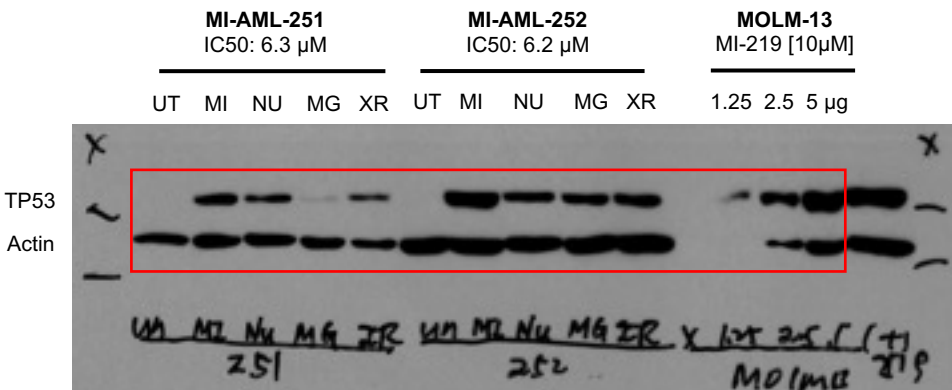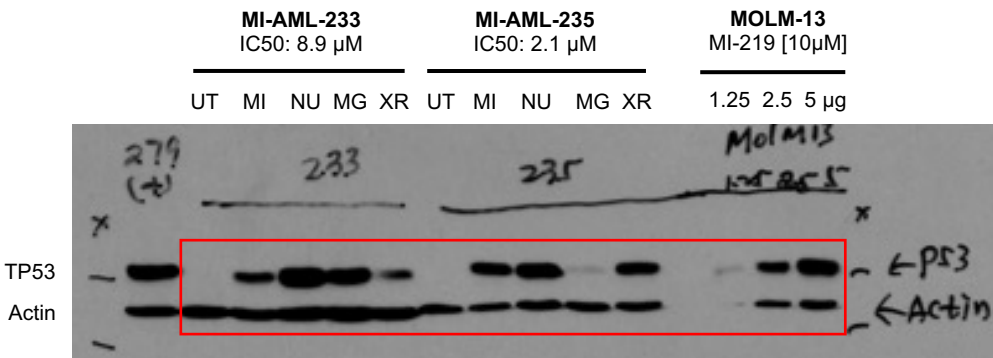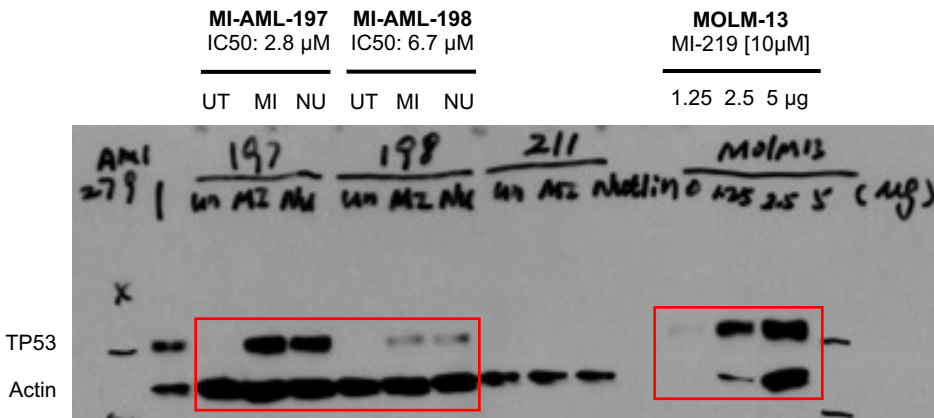

# Full unedited gels for Supplementary Figure 1: Sensitive AML (continued)

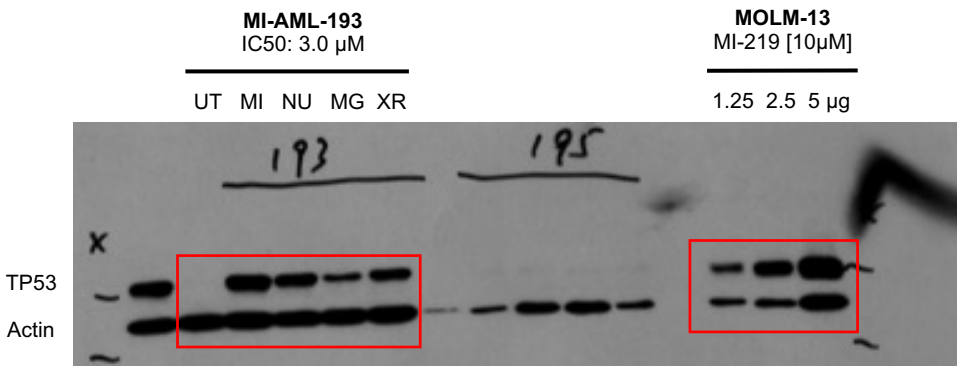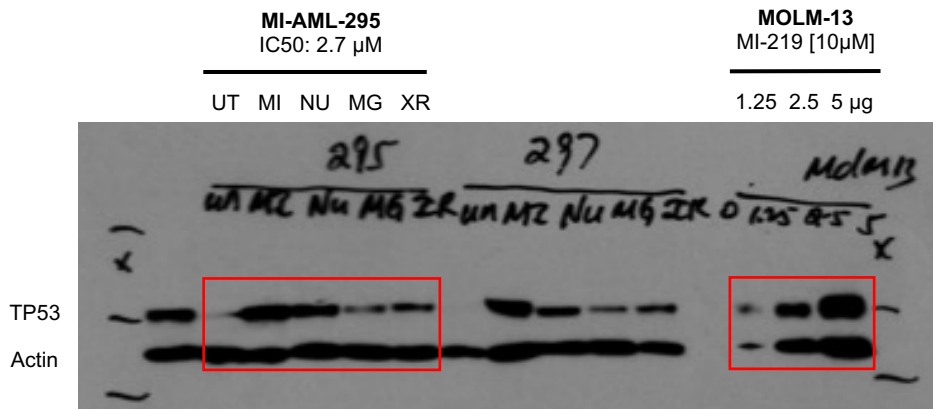

# Full unedited gels for Supplementary Figure 1: Resistant AML

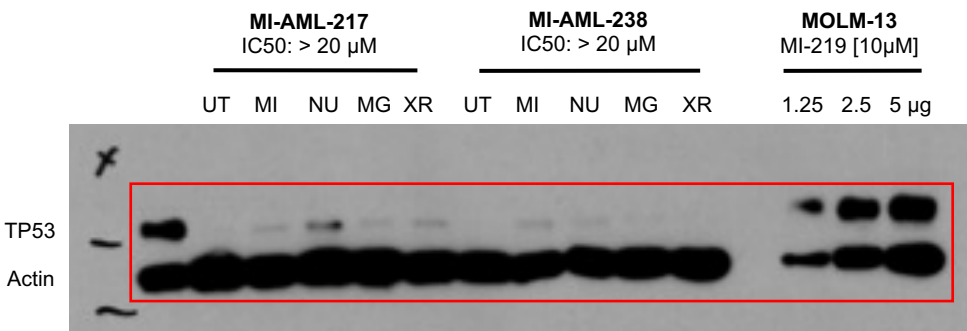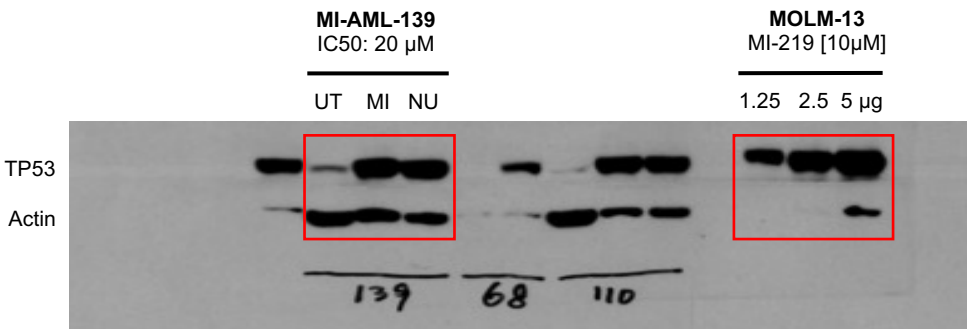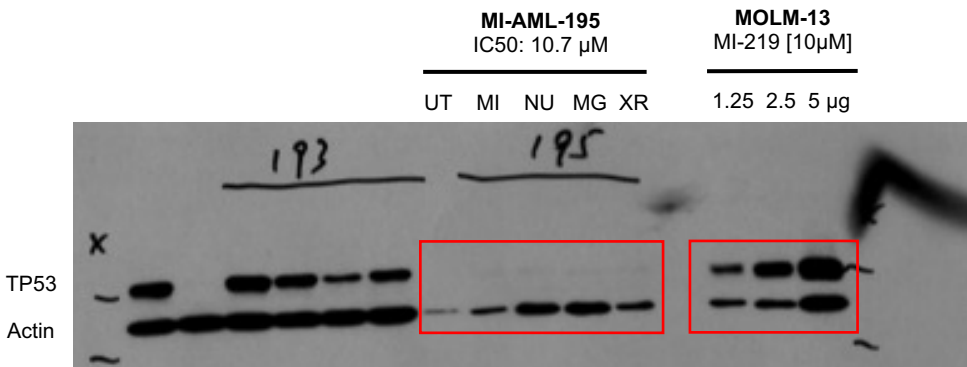

# Full unedited gels for Supplementary Figure 1: Resistant AML (continued)

**MI-AML-211**  
IC50: 20  $\mu$ M

**MOLM-13**  
MI-219 [10 $\mu$ M]

UT MI NU

1.25 2.5 5  $\mu$ g

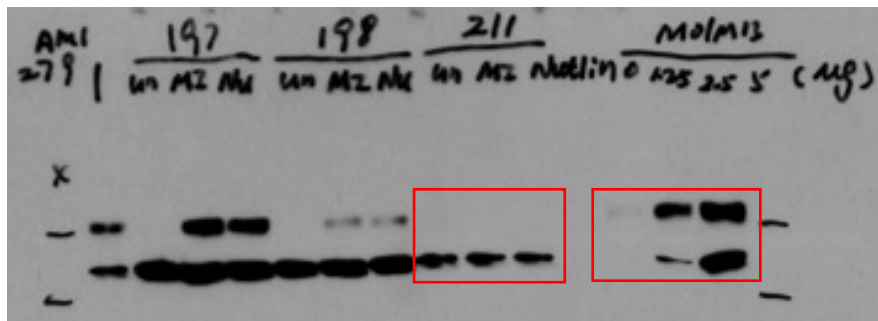

**MI-AML-250**  
IC50: 20  $\mu$ M **MUT TP53**

**MOLM-13**  
MI-219 [10 $\mu$ M]

UT MI NU MG XR

1.25 2.5 5  $\mu$ g

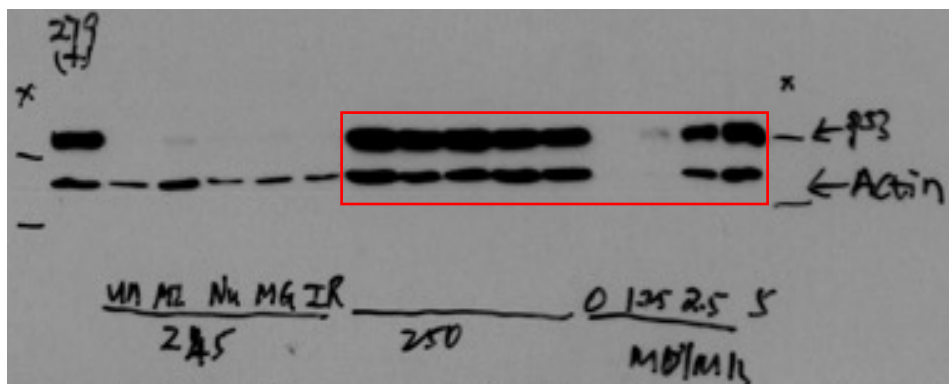

Supplement: sd2 [file 2]
